# Supplementary material for: Multiparameter Neural Network Modeling of Facilitated Transport Mixed Matrix Membranes for Carbon Dioxide Removal
Source: MDPI journal article supplement (doi:10.3390/membranes12040421), 2022-04-14
Supplement: s1 [file s1]

## Supplementary Information

### Multiparameter neural network modelling of facilitated transport mixed matrix membranes for carbon dioxide removal

\*Rizwan Nasir<sup>1</sup>, Humbul Suleman<sup>2</sup>, Khuram Maqsood<sup>1</sup>,

<sup>1</sup>*Department of Chemical Engineering, University of Jeddah, Jeddah, Asfan Road, Saudi Arabia*

<sup>2</sup>*School of Computing, Engineering and Digital Technologies, Teesside University, Middlesbrough TS1 3BX, United Kingdom.*

\*Corresponding author: E-mail: [rnasir@uj.edu.sa](mailto:rnasir@uj.edu.sa)

#### 1 Membrane preparation schemes

Nine (09) different types of membranes were synthesized in this study. The list of membranes synthesized from this study is tabulated in Table S1.

**Table S1: List of membranes synthesized in this study**

| Membranes                                   | PES<br>(wt. %) | CMS<br>(wt. %) | DEA<br>(wt. %) |
|---------------------------------------------|----------------|----------------|----------------|
| Pure PES Membrane                           | 20             | -              | -              |
| Facilitated Transport Mixed Matrix Membrane | 20             | 10             | 5              |
|                                             | 20             | 10             | 10             |
|                                             | 20             | 10             | 15             |
|                                             | 20             | 20             | 5              |
|                                             | 20             | 20             | 10             |
|                                             | 20             | 20             | 15             |
|                                             | 20             | 30             | 5              |
|                                             | 20             | 30             | 10             |
|                                             | 20             | 30             | 15             |

## 2 Characterization of Developed Membranes

Several characterization techniques were used to analyze the synthesized membranes. The characterization was carried out in four areas including surface and cross-sectional morphological, thermal, spectral and mechanical analyses were performed. Figure S1 shows the equipment used for the characterization.

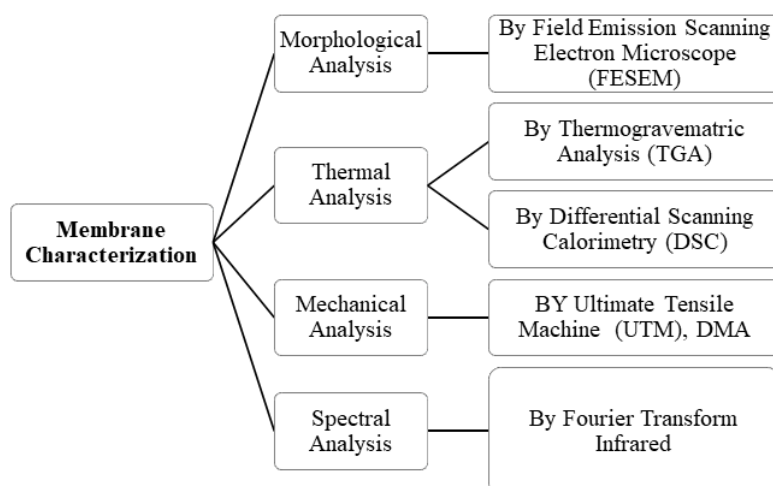

**Figure S1: Systematic diagram of membrane characterization**

**Table S2: Experimental data**

| Pure Polymeric Membrane |                               |                               |                    |
|-------------------------|-------------------------------|-------------------------------|--------------------|
| P<br>(bar)              | (P/l) <sub>CO2</sub><br>(GPU) | (P/l) <sub>CH4</sub><br>(GPU) | $\alpha_{CO2/CH4}$ |
| 2                       | 50.87                         | 16.49                         | 3.08               |
| 4                       | 42.41                         | 8.86                          | 4.79               |
| 6                       | 29.71                         | 6.08                          | 4.89               |
| 8                       | 25.51                         | 4.86                          | 5.25               |
| 10                      | 25.14                         | 4.65                          | 5.40               |

GPU = Gas Permeation unit

P/l = Permeance

$\alpha$  = Selectivity

**Table S3: Experimental data**

| Membranes              | P (bar) | (P/l) <sub>CO2</sub> (GPU) | (P/l) <sub>CH4</sub> (GPU) | $\alpha_{CO2/CH4}$ |
|------------------------|---------|----------------------------|----------------------------|--------------------|
| MMM DEA 05% filler 10% | 2       | 71.10                      | 13.66                      | 5.20               |
|                        | 4       | 44.55                      | 7.09                       | 6.28               |
|                        | 6       | 39.97                      | 4.93                       | 8.11               |
|                        | 8       | 39.11                      | 3.85                       | 10.15              |
|                        | 10      | 37.05                      | 3.24                       | 11.45              |

|                        |    |        |       |       |
|------------------------|----|--------|-------|-------|
| MMM DEA 10% filler 10% | 2  | 109.98 | 11.99 | 9.17  |
|                        | 4  | 78.38  | 7.65  | 10.25 |
|                        | 6  | 62.40  | 5.91  | 10.55 |
|                        | 8  | 60.68  | 5.58  | 10.87 |
|                        | 10 | 54.15  | 4.60  | 11.76 |
| MMM DEA 15% filler 10% | 2  | 117.32 | 11.95 | 9.82  |
|                        | 4  | 82.81  | 6.26  | 13.22 |
|                        | 6  | 80.91  | 4.32  | 18.72 |
|                        | 8  | 65.18  | 3.32  | 19.62 |
|                        | 10 | 56.31  | 2.79  | 20.21 |
| MMM DEA 05% filler 20% | 2  | 112.80 | 15.34 | 7.36  |
|                        | 4  | 68.34  | 9.20  | 7.43  |
|                        | 6  | 64.82  | 6.39  | 10.14 |
|                        | 8  | 61.96  | 5.42  | 11.44 |
|                        | 10 | 57.46  | 4.92  | 11.67 |
| MMM DEA 10% filler 20% | 2  | 127.06 | 11.69 | 10.86 |
|                        | 4  | 79.63  | 6.47  | 12.30 |
|                        | 6  | 65.18  | 6.11  | 10.67 |
|                        | 8  | 62.85  | 5.33  | 11.79 |
|                        | 10 | 61.21  | 5.16  | 11.86 |
| MMM DEA 15% filler 20% | 2  | 139.66 | 11.28 | 12.38 |
|                        | 4  | 100.56 | 5.78  | 17.39 |
|                        | 6  | 71.10  | 3.92  | 18.14 |
|                        | 8  | 65.18  | 3.16  | 20.62 |
|                        | 10 | 63.99  | 3.07  | 20.84 |
| MMM DEA 05% filler 30% | 2  | 138.02 | 11.52 | 11.98 |
|                        | 4  | 78.21  | 6.49  | 12.06 |
|                        | 6  | 69.21  | 4.43  | 15.63 |
|                        | 8  | 60.68  | 3.61  | 16.83 |
|                        | 10 | 56.31  | 3.11  | 18.12 |
| MMM DEA 10% filler 30% | 2  | 156.42 | 11.03 | 14.18 |
|                        | 4  | 113.53 | 6.34  | 17.92 |
|                        | 6  | 111.73 | 5.16  | 21.65 |
|                        | 8  | 92.62  | 4.19  | 22.12 |
|                        | 10 | 74.09  | 3.41  | 21.71 |
| MMM DEA 15% filler 30% | 2  | 171.68 | 7.39  | 23.24 |
|                        | 4  | 123.92 | 4.08  | 30.36 |
|                        | 6  | 123.49 | 3.24  | 38.16 |
|                        | 8  | 109.98 | 2.46  | 44.79 |
|                        | 10 | 106.65 | 2.08  | 51.39 |

*GPU = Gas Permeation unit*

*P/l = Permeance*

*$\alpha$  = Selectivity*
